# Supplementary material for: Accessible Low-Cost Laser Pointers for the Reduction of Aryl Halides via Triplet-Triplet Annihilation Upconversion in Aerated Gels
Source: MDPI journal article supplement (doi:10.3390/gels8120800), 2022-12-06
Supplement: s1 [file s1]

## *Supporting Information*

### Accessible low-cost laser pointers for the reduction of aryl halides via triplet-triplet annihilation upconversion in aerated gels

Paola Domínguez Domínguez, Sebastian Bonardd, Samuel Martín Koury, Raúl Pérez-Ruiz, M. Consuelo Jiménez, and David Díaz Díaz\*

## Table of contents

| Table/Figure | Caption                                                                                                                                                                                                                                                                                                                                                                               | Page  |
|--------------|---------------------------------------------------------------------------------------------------------------------------------------------------------------------------------------------------------------------------------------------------------------------------------------------------------------------------------------------------------------------------------------|-------|
| Table S1     | Photoreduction of 4'-bromoacetophenone ( <b>1</b> ) using two perpendicular laser pointers and different concentrations of the TTA-UC pair                                                                                                                                                                                                                                            | S3    |
| Table S2     | Photoreduction of 4'-bromoacetophenone ( <b>1</b> ) using two perpendicular laser pointers and different gelator concentrations                                                                                                                                                                                                                                                       | S3    |
| Table S3     | Photoreduction of 4'-bromoacetophenone ( <b>1</b> ) using two perpendicular laser pointers located at different distances from the sample                                                                                                                                                                                                                                             | S3    |
| Table S4     | Photoreduction of 4'-bromoacetophenone ( <b>1</b> ) using two perpendicular laser pointers and different irradiation times                                                                                                                                                                                                                                                            | S4    |
| Figure S1    | Connection setup: The red cable is placed on the negative pole of the power supply and the black cable on the positive pole of the power supply (1). Subsequently, the special hook of the red cable is connected to the spring that we find inside the laser and the cable with a crocodile head is placed on the side of the laser (2), leaving our system completely connected (3) | S4    |
| Figure S2    | Calibration curve of acetophenone by GC-FID                                                                                                                                                                                                                                                                                                                                           | S5    |
| Figure S3    | Representative GC-FID chromatograms of the photoreduction of different substates using laser pointers. The chromatograms of commercial reactants and products are also shown in each case as reference                                                                                                                                                                                | S6-S8 |
| Figure S4    | Representative <sup>1</sup> H NMR spectra of reaction products                                                                                                                                                                                                                                                                                                                        | S9    |

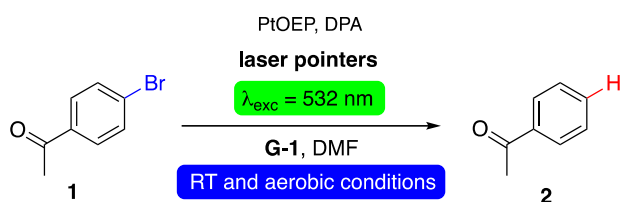

**Table S1.** Photoreduction of 4'-bromoacetophenone (**1**) using two perpendicular laser pointers and different concentrations of the TTA-UC pair.<sup>1</sup>

| Entry | [PtOEP]/[DPA]              | Yield <b>2</b> (%) <sup>2</sup> |
|-------|----------------------------|---------------------------------|
| 1     | 33.0 $\mu\text{M}$ /6.7 mM | 36.9                            |
| 2     | 68.6 $\mu\text{M}$ /5.0 mM | 29.5                            |
| 3     | 99.0 $\mu\text{M}$ /9.9 mM | 21.7                            |

<sup>1</sup> General conditions: [**1**] = 10 mM, [**G-1**] = 10 g/L, [dodecane] = 10 mM (int. std.), 24 h,  $\lambda_{\text{exc}} = 532 \text{ nm}$ , DMF = 3 mL. The distances between the laser pointers and the cuvette were 3 cm (lateral side) and 5 cm (top side).

<sup>2</sup> Standard deviation  $\pm 3\%$ .

**Table S2.** Photoreduction of 4'-bromoacetophenone (**1**) using two perpendicular laser pointers and different gelator concentrations.<sup>1</sup>

| Entry | [ <b>G-1</b> ] | Yield <b>2</b> (%) <sup>2</sup> |
|-------|----------------|---------------------------------|
| 1     | 10 g/L         | 36.9                            |
| 2     | 20 g/L         | 25.2                            |

<sup>1</sup> General conditions: [**1**] = 10 mM, [PtOEP] = 33  $\mu\text{M}$ , [DPA] = 6.7 mM, [dodecane] = 10 mM (int. std.), 24 h,  $\lambda_{\text{exc}} = 532 \text{ nm}$ , DMF = 3 mL. The distances between the laser pointers and the cuvette were 3 cm (lateral side) and 5 cm (top side). <sup>2</sup> Standard deviation  $\pm 3\%$ .

**Table S3.** Photoreduction of 4'-bromoacetophenone (**1**) using two perpendicular laser pointers located at different distances from the sample.<sup>1</sup>

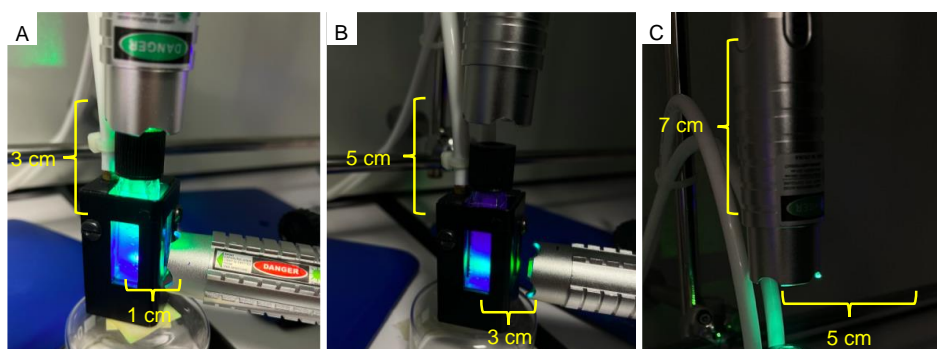

| Configuration | Yield <b>2</b> (%) <sup>2</sup> |
|---------------|---------------------------------|
| A             | 26.3                            |
| B             | 36.9                            |
| C             | 31.4                            |

<sup>1</sup> General conditions: [**1**] = 10 mM, [**G-1**] = 10 g/L, [PtOEP] = 33  $\mu\text{M}$ , [DPA] = 6.7 mM, [dodecane] = 10 mM (int. std.), 24 h,  $\lambda_{\text{exc}} = 532 \text{ nm}$ , DMF = 3 mL. <sup>2</sup> Standard deviation  $\pm 3\%$ .

**Table S4.** Photoreduction of 4'-bromoacetophenone (**1**) using two perpendicular laser pointers and different irradiation times. <sup>1</sup>

| Entry | Time | Yield <b>2</b> (%) <sup>2</sup> |
|-------|------|---------------------------------|
| 1     | 4 h  | 8.0                             |
| 2     | 12 h | 15.4                            |
| 3     | 24 h | 36.9                            |
| 4     | 48 h | 41.4                            |

<sup>1</sup> General conditions: [**1**] = 10 mM, [**G-1**] = 10 g/L, [PtOEP] = 33  $\mu$ M, [DPA] = 6.7 mM, [dodecane] = 10 mM (int. std.), 24 h,  $\lambda_{\text{exc}}$  = 532 nm, DMF = 3 mL. The distances between the laser pointers and the cuvette were 3 cm (lateral side) and 5 cm (top side). <sup>2</sup> Standard deviation  $\pm$  3%.

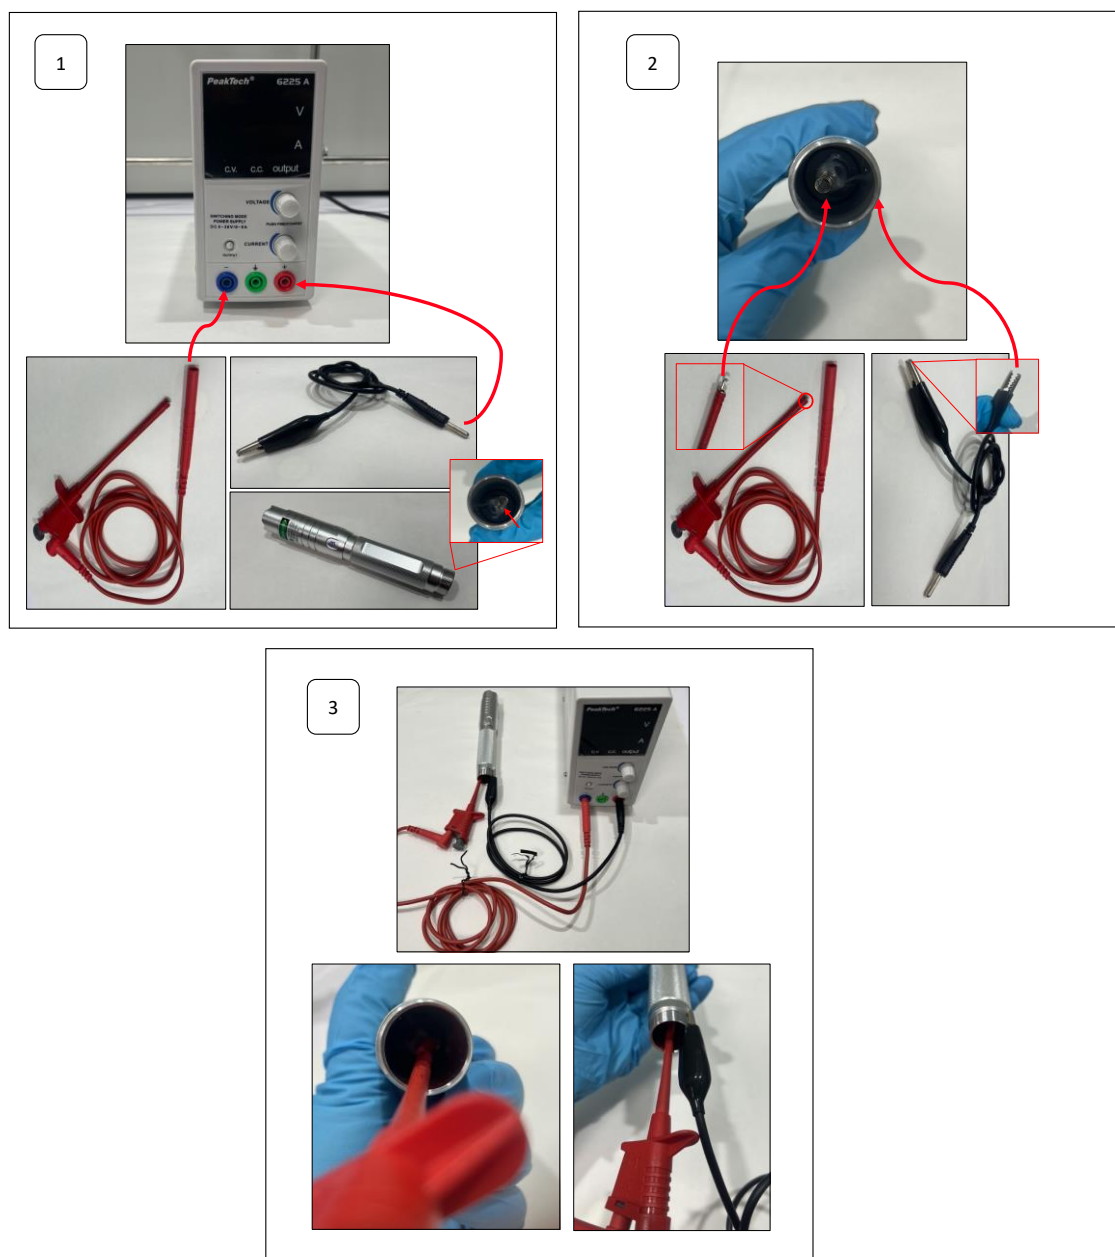

**Figure S1.** Connection setup: The red cable is placed on the negative pole of the power supply and the black cable on the positive pole of the power supply (1). Subsequently, the special hook of the red cable is

connected to the spring that we find inside the laser and the cable with a crocodile head is placed on the side of the laser (2), leaving our system completely connected (3).

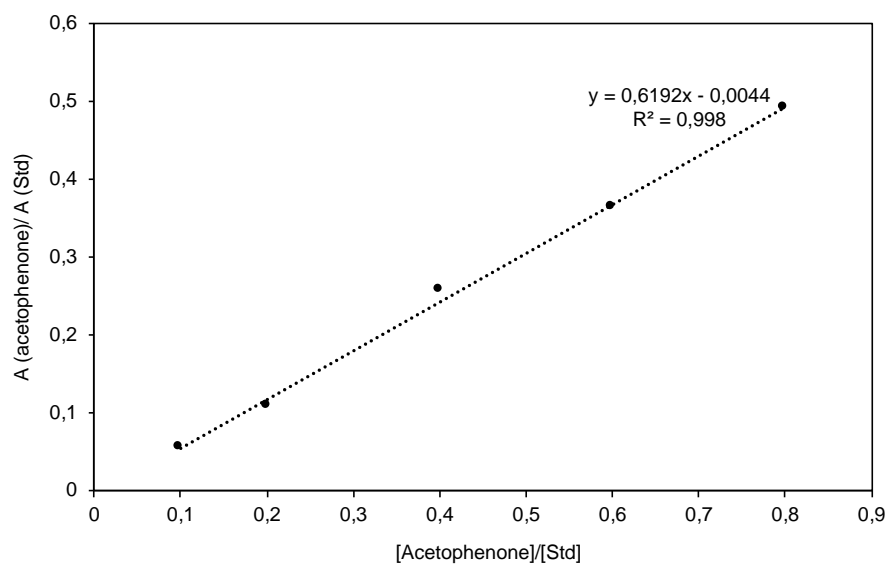

**Figure S2.** Calibration curve of acetophenone by GC-FID.

Chromatogram of comercial reactant 2-bromoacetophenone

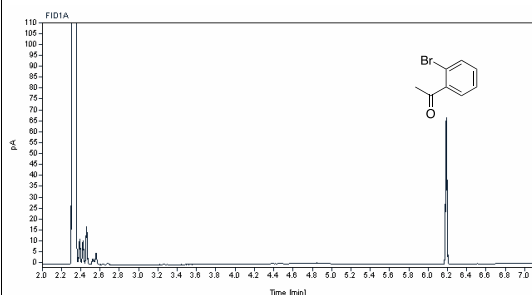

Chromatogram of the commercial product acetophenone

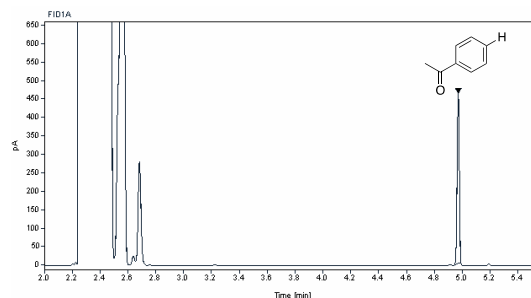

Chromatogram after reaction

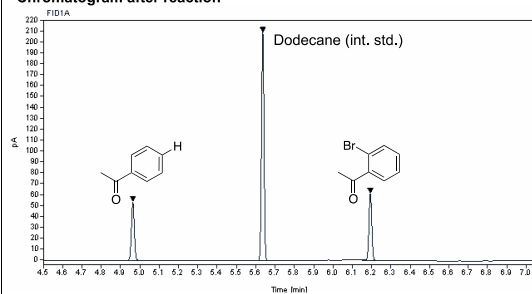

Chromatogram of comercial reactant 4'-iodoacetophenone

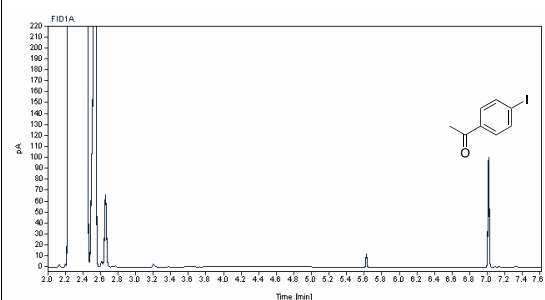

Chromatogram of the commercial product acetophenone

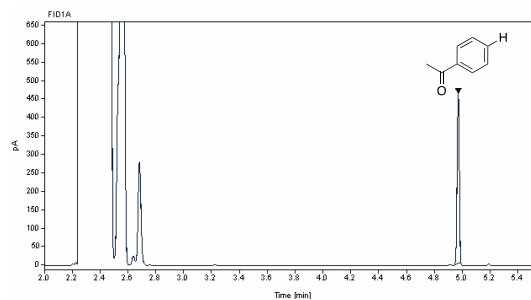

Chromatogram after reaction

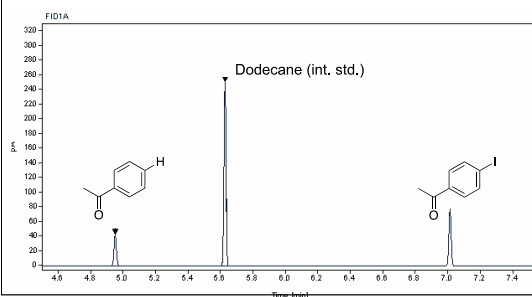

Chromatogram of comercial reactant 2-bromoquinoline

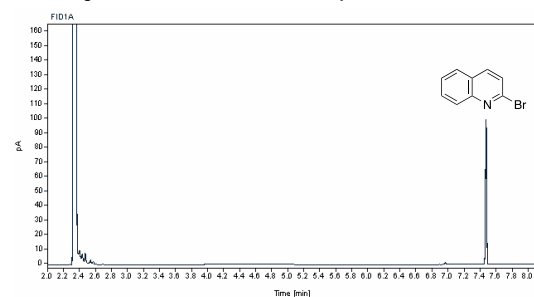

Chromatogram of the commercial product quinoline

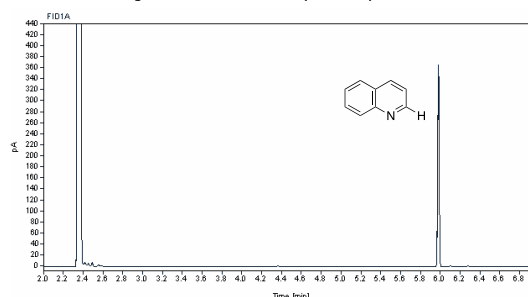

Chromatogram after reaction

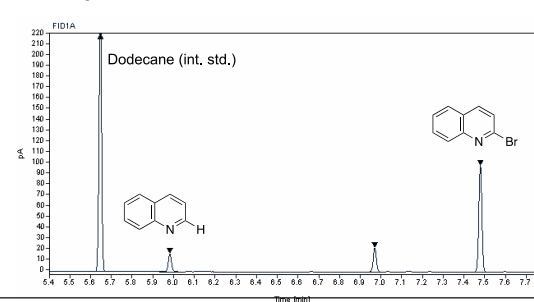

Chromatogram of comercial reactant 3-bromoquinoline

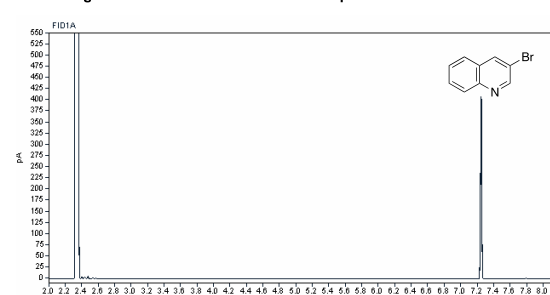

Chromatogram of the commercial product quinoline

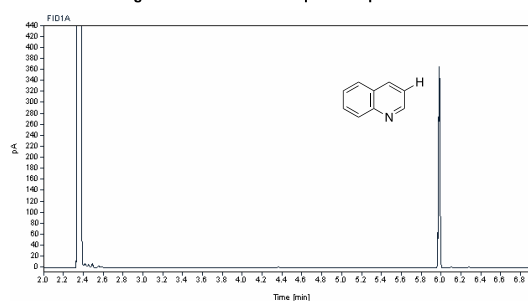

Chromatogram after reaction

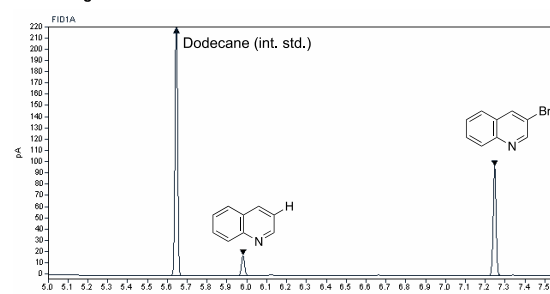

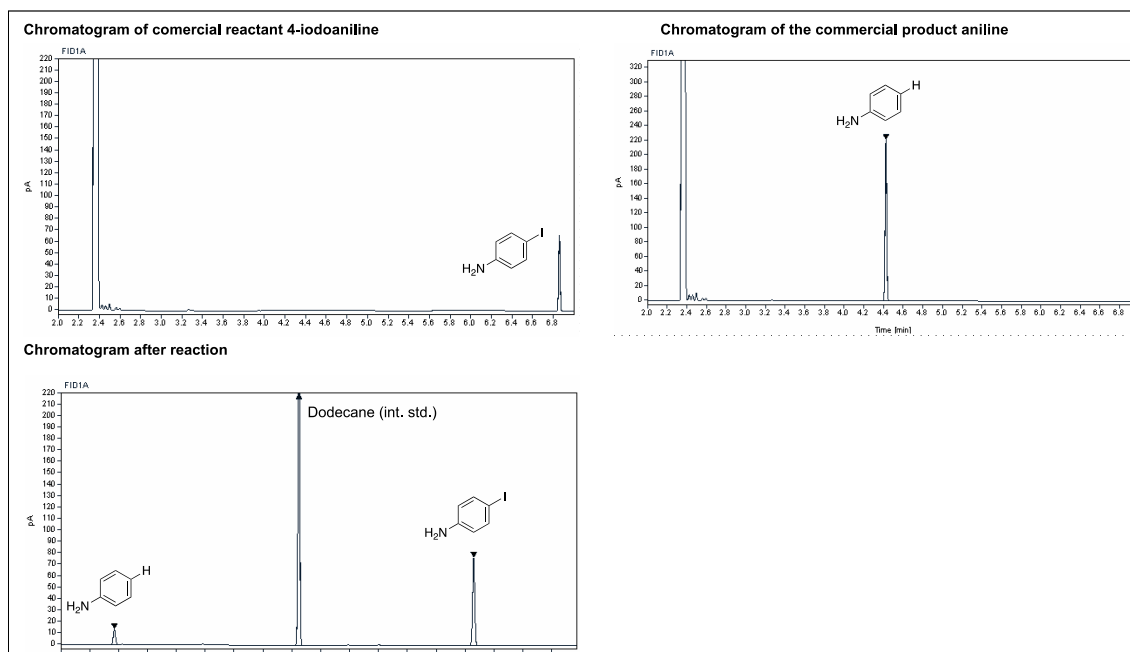

**Figure S3.** Representative GC-FID chromatograms of the photoreduction of different substates using laser pointers. The chromatograms of commercial reactants and products are also shown in each case as reference.



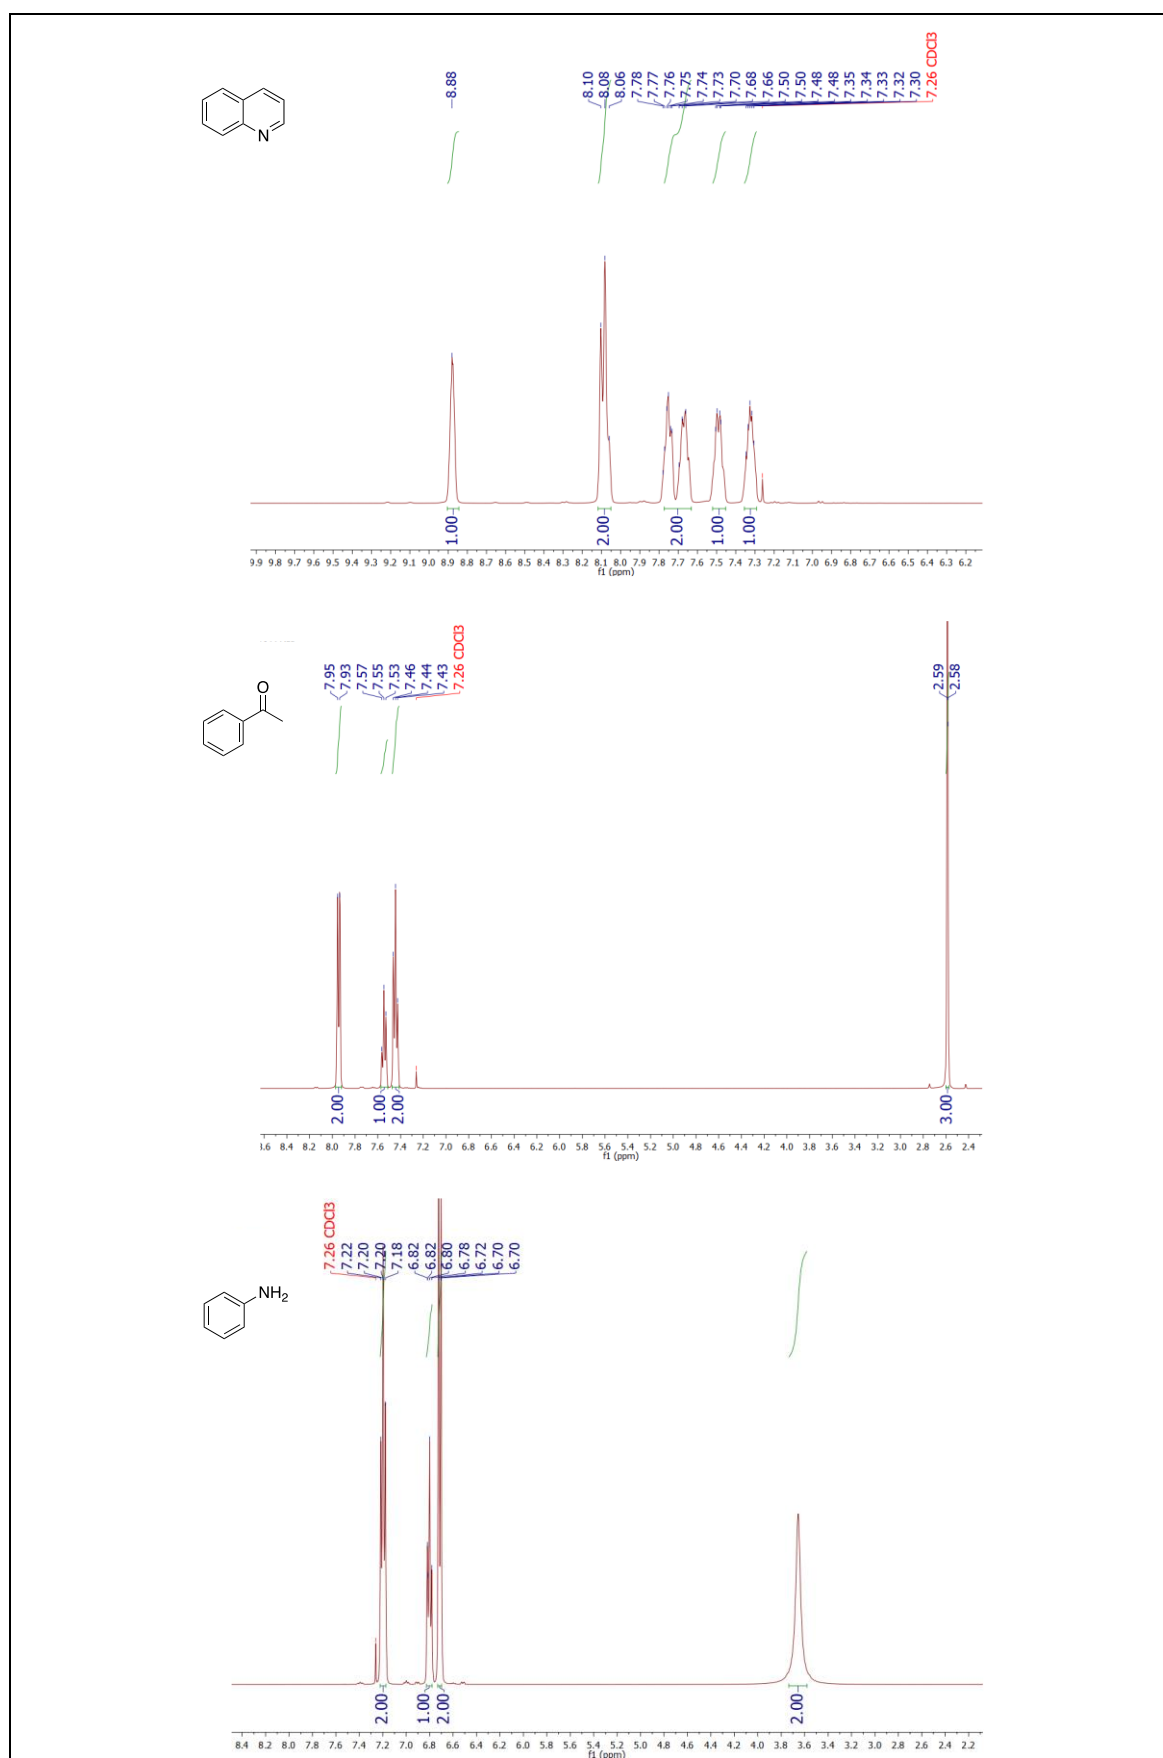

**Figure S4** Representative  $^1\text{H}$  NMR spectra of reaction products.
